# Supplementary material for: Synthesis and characterization of elusive cyclo-di- and -tri-phosphino-1,3-diphosphonium salts: fundamental frameworks in catena-organophosphorus chemistry
Source: Royal Society of Chemistry journal article supplement (doi:10.1039/b707741f), 2007-01-01
Supplement: b707741f.pdf [file b707741f.pdf]

*Supporting Information for:*

# Synthesis and Characterization of Elusive Cyclo-di- and -tri-phosphino-1,3- diphosphonium Salts: Fundamental Frameworks in *catena*-Organophosphorus Chemistry

Susanne D. Riegel,<sup>a</sup> Neil Burford,<sup>\*a</sup> Michael D. Lumsden,<sup>b</sup> and Andreas Decken<sup>c</sup>

<sup>a</sup>Department of Chemistry, Dalhousie University, Halifax, NS, B3H 4J3, Canada;

<sup>b</sup>Atlantic Region Magnetic Resonance Center, Dalhousie University, Halifax, NS B3H 4J3, Canada; <sup>c</sup>Department of Chemistry, University of New Brunswick, Fredericton, NB, E3A 6E2

\*Neil.Burford@dal.ca

This file includes:

|                                                                                                                                       |          |
|---------------------------------------------------------------------------------------------------------------------------------------|----------|
| <b>S1: GENERAL REMARKS .....</b>                                                                                                      | <b>2</b> |
| S1.1: CAUTION .....                                                                                                                   | 2        |
| S1.2: SOLVENTS AND REAGENTS.....                                                                                                      | 2        |
| S1.3: NMR SPECTROSCOPY.....                                                                                                           | 2        |
| S1.4: INSTRUMENTATION AND ANALYSIS.....                                                                                               | 3        |
| <b>S2: EXPERIMENTAL.....</b>                                                                                                          | <b>3</b> |
| S2.1: 1,2,3,4-TETRACYCLOHEXYL-1,3-DIMETHYL-2,4-DIPHOSPHINO-1,3-DIPHOSPHONIUM BIS-TRIFLATE, 4B[OTf] <sub>2</sub> .....                 | 3        |
| S2.2: 2,4,5-TRIMETHYL-1-DIMETHYL-3-DIMETHYL-2,4,5-TRIPHOSPHINO-1,3-DIPHOSPHONIUM BIS-TRIFLATE, 5A[OTf] <sub>2</sub> .....             | 4        |
| S2.3: 2,4,5-TRIMETHYL-1-DIPHENYL-3-DIMETHYL-2,4,5-TRIPHOSPHINO-1,3-DIPHOSPHONIUM BIS-TRIFLATE, 5B[OTf] <sub>2</sub> .....             | 4        |
| S2.4: 2,4,5-TRICYCLOHEXYL-1-DIMETHYL-3-CYCLOHEXYLMETHYL-2,4,5-TRIPHOSPHINO-1,3-DIPHOSPHONIUM BIS-TRIFLATE, 5C[OTf] <sub>2</sub> ..... | 5        |
| S2.5: 1,1-DIPHENYL-2,3,4,5-TETRAMETHYL-2,3,4,5-TETRAPHOSPHINO-1-PHOSPHONIUM TRIFLATE, 11[OTf] .....                                   | 5        |
| <b>S3: CRYSTALLOGRAPHIC DATA.....</b>                                                                                                 | <b>6</b> |
| <b>S4: REFERENCES.....</b>                                                                                                            | <b>7</b> |

## **S1: General Remarks**

### **S1.1: Caution**

Phosphines have a pungent odor and can be pyrophoric. Due to the nature of the reaction, care should be taken to minimize the equivalents of MeOTf used. Small-scale (less than 1 mmol) reactions were carried out in a glove box under and inert N<sub>2</sub> atmosphere.

### **S1.2: Solvents and Reagents**

Solvents were dried on a MBraun solvent purification system and stored over activated 4.0 Å molecular sieves prior to use. Anhydrous MeCN was purchased from Sigma-Aldrich and used as received. Starting materials (PCy)<sub>4</sub>,<sup>1</sup> (PMe)<sub>5</sub>,<sup>2</sup> were prepared on a Schlenk line according to literature methods. [Cy<sub>4</sub>P<sub>5</sub>Me<sub>2</sub>][OTf],<sup>3</sup> [Cy<sub>4</sub>P<sub>5</sub>Ph<sub>2</sub>][OTf],<sup>3</sup> [Me<sub>6</sub>P<sub>5</sub>][OTf],<sup>3</sup> [Me<sub>4</sub>P<sub>5</sub>Ph<sub>2</sub>][OTf] were prepared in the glovebox. Ph<sub>2</sub>PCl, and MeOTf were purchased from Aldrich and used as received. Me<sub>2</sub>PCl was purchased from Strem, Me<sub>3</sub>SiOTf from Aldrich, and both were vacuum distilled prior to use.

### **S1.3: NMR Spectroscopy**

Solution <sup>1</sup>H-, <sup>13</sup>C-, <sup>19</sup>F-, and <sup>31</sup>P-NMR spectra were collected at room temperature on Bruker AC-250 and Bruker Avance 500 NMR spectrometers. Chemical shifts are reported in ppm relative to an external reference standard [100% SiMe<sub>4</sub> (<sup>1</sup>H, <sup>13</sup>C), CCl<sub>4</sub> (<sup>19</sup>F), and 85% H<sub>3</sub>PO<sub>4</sub> (<sup>31</sup>P)], and both <sup>1</sup>H and <sup>13</sup>C NMR were calibrated to an internal reference signal (<sup>1</sup>H: CHDCl<sub>2</sub>, 5.32 ppm, C<sub>6</sub>D<sub>5</sub>H, 7.16 ppm; <sup>13</sup>C: CD<sub>2</sub>Cl<sub>2</sub> 54.00 ppm, C<sub>6</sub>D<sub>6</sub>, 128.5 ppm). <sup>31</sup>P{<sup>1</sup>H} NMR spectra were obtained on *d*<sub>3</sub>-MeCN solutions and the corresponding parameters are presented in Table S1 along with other related species to allow for comparison. For **4b**[OTf]<sub>2</sub>, <sup>31</sup>P{<sup>1</sup>H} NMR parameters are reported as observed while the reported <sup>31</sup>P{<sup>1</sup>H} NMR parameters for derivatives of **5**[OTf]<sub>2</sub> were obtained by computer simulation using gNMR<sup>4</sup> at fields of 101.3 MHz and 202.6 MHz. Low

solubility and decomposition in solution precluded the acquisition of meaningful  $^1\text{H}$  and

| Table S1 $^{31}\text{P}\{^1\text{H}\}$ NMR Parameters <sup>fc</sup> |                                                                                                  | 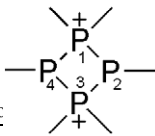 |               |              |                                                         |                                                         |                                                         |
|---------------------------------------------------------------------|--------------------------------------------------------------------------------------------------|-----------------------------------------------------------------------------------|------------------------------------------------------------------------------------------------|------------------------------------------------------------------------------------------------|---------------------------------------------------------|---------------------------------------------------------|---------------------------------------------------------|
| Spin System                                                         | 4a[Me <sub>3</sub> SnF <sub>2</sub> ] <sub>2</sub> <sup>5</sup><br>A <sub>2</sub> X <sub>2</sub> | 4b[OTf] <sub>2</sub><br>A <sub>2</sub> X <sub>2</sub>                             | 5a[OTf] <sub>2</sub><br>ABGMX                                                                  | 5c[OTf] <sub>2</sub><br>ABGMX                                                                  | 10[OTf]<br>AA'BB'X                                      | 11[OTf]<br>AA'BB'X                                      | 12[OTf]<br>AA'BB'X                                      |
| $\delta$ (ppm)                                                      | <b>41.19 [1,3]</b><br>2.17 [2,4]                                                                 | <b>10.25 [1,3]</b><br>-52.50 [2,4]                                                | <b>72.6 [1]</b><br>-20.9 [2]<br><b>67.0 [3]</b><br>-0.2 [4]<br>-7 [5]                          | <b>52.6 [1]</b><br>-29.3 [2]<br><b>42.8 [3]</b><br>-23.6 [4]<br>-35.4 [5]                      | <b>101 [1]</b><br>20 [2,5]<br>24 [3,4]                  | <b>110 [1]</b><br>16 [2,5]<br>28 [3,5]                  | <b>42 [1]</b><br>-8 [2,5]<br>-14 [3,4]                  |
| $^1J_{PP}$ (Hz)                                                     | <b>287</b>                                                                                       | <b>224</b>                                                                        | <b>-314 [1,2]</b><br><b>-327 [1,5]</b><br><b>-302 [2,3]</b><br><b>-320 [3,4]</b><br>-274 [4,5] | <b>-327 [1,2]</b><br><b>-379 [1,5]</b><br><b>-338 [2,3]</b><br><b>-335 [3,4]</b><br>-313 [4,5] | <b>-346 [1,2; 1,5]</b><br>-277 [2,3; 4,5]<br>-264 [3,4] | <b>-364 [1,2; 1,5]</b><br>-272 [2,3; 4,5]<br>-248 [3,4] | <b>-332 [1,2; 1,5]</b><br>-264 [2,3; 4,5]<br>-255 [3,4] |
| $^2J_{PP}$ (Hz)                                                     | n/a                                                                                              | n/a                                                                               | <b>36 [1,3]</b><br><b>12 [1,4]</b><br>5 [2,4]<br>9 [2,5]<br><b>15 [3,5]</b>                    | <b>37 [1,3]</b><br><b>1 [1,4]</b><br>-13 [2,4]<br>-12 [2,5]<br><b>2 [3,5]</b>                  | <b>-3 [1,3; 1,4]</b><br>16 [2,4; 3,5]<br>-19 [2,5]      | <b>-1 [1,3; 1,4]</b><br>24 [2,4; 3,5]<br>-15 [2,5]      | <b>9 [1,3; 1,4]</b><br>0 [2,4; 3,5]<br>-21 [2,5]        |

<sup>a</sup> Tabulated parameters are reported as observed for 4[anion]<sub>2</sub>, and as obtained by computer simulation (at 5.87 T) for the remaining derivatives. Numbers in square brackets refer to the phosphorus atom labels in the above scheme and bolded values correspond to the phosphonium centre.

<sup>13</sup>C-NMR data in some cases.

## S1.4: Instrumentation and Analysis

Raman spectra were obtained for powdered and crystalline samples on a Bruker RFS 100 instrument equipped with a Nd:YAG laser (1064 nm). Melting points were obtained on samples sealed under dry nitrogen in glass capillary tubes using an electrochemical melting point. Chemical analysis were performed by Canadian Microanalytical Services Ltd., Delta, British Columbia, Canada. These derivatives are extremely reactive and sensitive to moisture, which may have compromised the elemental analysis data despite several attempts.

## S2: Experimental

### S2.1: 1,2,3,4-tetracyclohexyl-1,3-dimethyl-2,4-diphosphino-1,3-diphosphonium bis-triflate, 4b[OTf]<sub>2</sub>

MeOTf (115.3  $\mu\text{L}$ , 1.02 mmol, 5 eq) was added directly to (PCy)<sub>4</sub> (0.093 g, 0.204 mmol). The resultant white paste was allowed to stir for 17 hours. Pure crystalline product (0.137 g, 0.174 mmol, 86%) was obtained through Et<sub>2</sub>O vapor diffusion into a concentrated CH<sub>3</sub>CN solution of the white precipitate. dp: 203 – 206 °C; elemental analysis (Found: C, 42.9; H 6.5; Calc. for C<sub>28</sub>H<sub>50</sub>F<sub>6</sub>O<sub>6</sub>P<sub>4</sub>S<sub>2</sub> (784.19 g mol<sup>-1</sup>): C, 42.9; H, 6.4); Raman (171 mW, 25 °C, cm<sup>-1</sup>, relative intensities): 2944 (74), 2907 (15), 2857 (23), 2251 (7), 1495 (8), 1447 (18), 1348 (8), 1272 (12), 1031 (44), 997 (9), 848 (12), 818 (8.4), 756 (13), 726 (15), 455 (9), 349 (11), 315 (11), 177 (6), 151 (8), 84 (100); <sup>1</sup>H NMR (*d*<sub>3</sub>-MeCN, 300 K, 500 MHz):  $\delta$  = 3.28 (bm, 2H), 2.840 (bm, 2H), 2.62 (d, 6H, <sup>2</sup>*J*<sub>PH</sub> = 13 Hz, [Cy<sub>4</sub>P<sub>4</sub>(CH<sub>3</sub>)<sub>2</sub>][OTf]<sub>2</sub>), 2.09 (bm, 4H), 2.00 (s, 4H), 1.83 (bm, 12H), 1.59 (bm, 8H), 1.40 ppm (bm, 12H); <sup>13</sup>C NMR (*d*<sub>3</sub>-MeCN, 300 K, 125.8 MHz):  $\delta$  = 37.51 (m), 37.47 (m), 35.24 (m), 30.65 (m), 26.09 (m), 25.44 (m), 24.37 (d, <sup>1</sup>*J*<sub>PC</sub> = 37.9 Hz, [Cy<sub>4</sub>P<sub>4</sub>(CH<sub>3</sub>)<sub>2</sub>][OTf]<sub>2</sub>), 3.23 ppm (d); <sup>19</sup>F NMR (*d*<sub>3</sub>-MeCN, 300 K, 235.4 MHz):  $\delta$  = -79.77 ppm (s, -CF<sub>3</sub>); <sup>31</sup>P{<sup>1</sup>H} NMR data in Table S1.

### **S2.2: 2,4,5-trimethyl-1-dimethyl-3-dimethyl-2,4,5-triphosphino-1,3-diphosphonium bis-triflate, 5a[OTf]<sub>2</sub>**

MeOTf (56.6  $\mu\text{L}$ , 0.50 mmol, 2.5 eq) was added to (PMe)<sub>5</sub> (0.046 g, 0.20 mmol). A white precipitate began to form after 30 seconds; stirred for a further 30 minutes. The precipitate was washed with Et<sub>2</sub>O (2 x 2 mL) to yield 0.091 g of crude product (0.16 mmol, 82%); dp: 212 – 216 °C; elemental analysis (Found: C, 19.2; H, 4.1; Calc. for C<sub>9</sub>H<sub>21</sub>F<sub>6</sub>O<sub>6</sub>P<sub>5</sub>S<sub>2</sub> (558.24 g mol<sup>-1</sup>): C, 19.4; H, 3.8); Raman (171 mW, 25 °C, cm<sup>-1</sup>): 2991 (36), 2919 (100), 1420 (10), 1263 (8), 1225 (6), 1030 (57), 762 (23) 705 (16), 683 (10), 576 (12), 364 (38), 351 (13), 317 (10), 269 (18), 202 (41), 85 (67); <sup>19</sup>F NMR (*d*<sub>3</sub>-MeCN, 300 K, 235.4 MHz):  $\delta$  = -79.79 ppm (s, -CF<sub>3</sub>); <sup>31</sup>P{<sup>1</sup>H} NMR data in Table S1.

### **S2.3: 2,4,5-trimethyl-1-diphenyl-3-dimethyl-2,4,5-triphosphino-1,3-diphosphonium bis-triflate, 5b[OTf]<sub>2</sub>**

MeOTf (89.5  $\mu\text{L}$ , 0.791 mmol, 5 eq) was added directly to  $[\text{Me}_4\text{P}_3\text{Ph}_2][\text{OTf}]$  (0.082 g, 0.158 mmol). The MeOTf solubilized the oil almost instantaneously, and a thick white solid formed within 30 seconds. This was allowed to stir for a further 5 hours. X-ray quality crystals (0.054 g, 0.057 mmol, 50%) were obtained from  $\text{Et}_2\text{O}$  vapor diffusion into a concentrated  $\text{CH}_3\text{CN}$  solution of the product. dp: 186 – 189  $^\circ\text{C}$ ; Raman (250 mW, 25  $^\circ\text{C}$ ,  $\text{cm}^{-1}$ , relative intensities): 2935 (61), 2906 (14), 2860 (22), 1447 (20), 1267 (7), 1032 (53), 847 (15), 814 (13), 755 (15), 721 (7), 707 (24), 573 (10), 398 (6), 350 (12), 315 (14), 288 (6), 207 (11), 147 (20), 119 (8), 84(100); Crystalline samples could not be separated from an oily coating and redissolved crystals give complex  $^{31}\text{P}$  NMR spectra.

#### ***S2.4: 2,4,5-tricyclohexyl-1-dimethyl-3-cyclohexylmethyl-2,4,5-triphosphino-1,3-diphosphonium bis-triflate, 5c[OTf]<sub>2</sub>***

MeOTf (74.9  $\mu\text{L}$ , 0.66 mmol, 1.5 eq) was added directly to  $[\text{Cy}_4\text{P}_5\text{Me}_2][\text{OTf}]$  (0.294 g, 0.44 mmol). The paste was allowed to stir for 7 hours, and then was dissolved in  $\text{CH}_3\text{CN}$  and recrystallized by slow evaporation at room temperature (0.314 g, 0.38 mmol, 86%); mp: 187 – 191  $^\circ\text{C}$ ; elemental analysis (Found: C, 39.8; H, 7.0; Calc for  $\text{C}_{29}\text{H}_{53}\text{F}_6\text{O}_6\text{P}_5\text{S}_2$  (830.45  $\text{g mol}^{-1}$ ) C, 41.9; H, 6.4; Raman (171 mW, 25  $^\circ\text{C}$ ,  $\text{cm}^{-1}$ , relative intensities): 2936 (100), 2907 (20), 2859 (34), 2252 (7), 1448 (22), 1342 (7), 1297 (9), 1266 (15), 1196 (9), 1032 (56), 999 (9), 847 (13), 814 (12), 755 (15), 708 (23), 573 (8), 398 (13), 350 (11), 315 (11), 219 (9), 147 (17), 119 (6), 85 (77);  $^{31}\text{P}\{^1\text{H}\}$  NMR parameters for **5c**[OTf]<sub>2</sub> in Table S1,  $^{31}\text{P}$  NMR spectra additionally indicated the presence of a number of species including an  $\text{A}_2\text{X}_2$  system characteristic of  $[\text{Cy}_4\text{P}_4\text{Me}_2][\text{OTf}]_2$ , **4b**, and an  $\text{AMX}_2$  spin system characteristic of  $[\text{Cy}_4\text{P}_4\text{Me}][\text{OTf}]$ , **8**.

#### ***S2.5: 1,1-diphenyl-2,3,4,5-tetramethyl-2,3,4,5-tetraphosphino-1-phosphonium triflate, 11[OTf]***

A mixture of  $\text{PPh}_2\text{Cl}$  (0.116 mL, 0.646 mmol) and  $\text{Me}_3\text{SiOTf}$  (0.140 mL, 0.775 mmol) in  $\text{CH}_2\text{Cl}_2$  (1.5 mL) was added to a solution of  $(\text{PMe})_5$  (0.099 g, 0.430 mmol) in  $\text{CH}_2\text{Cl}_2$  (2

mL). After stirring for 30 minutes, the solution was concentrated to half the volume *in vacuo*. The addition of Et<sub>2</sub>O (~ 5 mL) resulted in an oily precipitate that was washed with Et<sub>2</sub>O (2 x 2 mL), and <sup>31</sup>P-NMR spectra were obtained on redissolved samples. Relevant parameters are presented in Table S1.

### S3: Crystallographic Data

Data was collected on a Bruker AXS P4/SMART 1000 diffractometer using  $\omega$  and  $\theta$  scans with a scan width of 0.3 ° and 10 s exposure times. The detector distance was 5 cm. The data were reduced (SAINT)<sup>6</sup> and corrected for adsorption (SADABS)<sup>7</sup> for **4b** and **5c** and (TWINABS) for **5b**. For [Me<sub>5</sub>P<sub>5</sub>Ph<sub>2</sub>][OTf]<sub>2</sub> **5b**[OTf]<sub>2</sub>, the crystal was a multiple twin and the orientation matrixes for the two major components were determined (CELL\_NOW). All three structures were solved by direct methods and refined by full-matrix least squares on F<sup>2</sup>(SHELXTL). All non-hydrogen atoms were refined using anisotropic displacement parameters. Hydrogen atoms were included in calculated positions and refined using a riding model.

**4b**[OTf]<sub>2</sub>•MeCN: C<sub>30</sub>H<sub>53</sub>F<sub>6</sub>NO<sub>6</sub>P<sub>4</sub>S<sub>2</sub>, colorless, irregular, crystal size 0.43 x 0.35 x 0.15 mm<sup>3</sup>, triclinic, space group  $P\bar{1}a$  = 10.5943(18),  $b$  = 13.159(2),  $c$  = 15.941(3) Å,  $\alpha$  = 67.929(2),  $\beta$  = 86.020(2),  $\gamma$  = 76.438(2) °,  $V$  = 2001.6(6) Å<sup>3</sup>,  $Z$  = 2,  $\mu$  = 0.360 mm<sup>-1</sup>,  $\lambda(\text{Mo}_{\text{K}\alpha})$  = 0.71073 Å,  $2\theta_{\text{max}}$  = 27.49 °, collected (independent) reflections = 14035 (8710),  $R_{\text{int}}$  = 0.0277; refined parameters,  $R_1$  = 0.0564,  $wR_2$  = 0.1180 for all data, max./min residual electron density = 0.847/ -0.461 e.Å<sup>-3</sup>.

**5b**[OTf]<sub>2</sub>: C<sub>19</sub>H<sub>25</sub>F<sub>6</sub>O<sub>6</sub>P<sub>5</sub>S<sub>2</sub>, colorless, irregular, crystal size 0.40 x 0.20 x 0.10mm<sup>3</sup>, triclinic, space group  $P\bar{1}a$  = 7.925(6),  $b$  = 11.951(10),  $c$  = 16.193(15) Å,  $\alpha$  = 72.451(16),  $\beta$  = 78.848(11),  $\gamma$  = 84.629(12) °,  $V$  = 1434(2) Å<sup>3</sup>,  $Z$  = 2,  $\mu$  = 0.537 mm<sup>-1</sup>,  $\lambda(\text{Mo}_{\text{K}\alpha})$  = 0.71073 Å,  $2\theta_{\text{max}}$  = 27.48 °, collected (independent) reflections = 6370 (6370); refined parameters,  $R_1$  = 0.0968,  $wR_2$  = 0.2079 for all data, max./min residual electron density = 0.702/-0.462 e.Å<sup>-3</sup>.

**5c**[OTf]<sub>2</sub>: C<sub>29</sub>H<sub>53</sub>F<sub>6</sub>O<sub>6</sub>P<sub>5</sub>S<sub>2</sub>, colorless, parallelepiped, crystal size 0.35 x 0.15 x 0.05

mm<sup>3</sup>, monoclinic, space group  $P2_1$ ,  $a = 11.716(7)$ ,  $b = 9.356(6)$ ,  $c = 18.017(11)$  Å,  $\alpha = \gamma = 90$ ,  $\beta = 92.307(9)^\circ$ ,  $V = 1973(2)$  Å<sup>3</sup>,  $Z = 2$ ,  $\mu = 0.404$  mm<sup>-1</sup>,  $\lambda(\text{Mo}_{\text{K}\alpha}) = 0.71073$  Å,  $2\theta_{\text{max}} = 27.92^\circ$  collected (independent) reflections = 12874 (7004),  $R_{\text{int}} = 0.0606$ ; refined parameters,  $R_1 = 0.0835$ ,  $wR_2 = 0.1729$  for all data, max./min residual electron density = 1.690/-0.519 e.Å<sup>-3</sup>.

CCDC 640152 – 640154 (**4b**, **5b**, and **5c**, respectively) contain the supplementary crystallographic data for this paper. These data can be obtained free of charge from the Cambridge Crystallographic Data Centre via [www.ccdc.cam.ac.uk/data\\_request/cif](http://www.ccdc.cam.ac.uk/data_request/cif).

## S4: References

- (1) Henderson, W. A.; Epstein, M.; Seichter, F. S. *J.Am.Chem.Soc.* **1963**, *85*, 2462-2466.
- (2) Baudler, M.; Glinka, K. *Inorg.Synth.* **1989**, *25*, 1-5.
- (3) Dyker, C. A., Riegel, S. D., Burford, N., Lumsden, M. D., and Decken, A. *Journal Of The American Chemical Society* . 2007.

Ref Type: In Press

- (4) Budzelaar, P. H. M. *gNMR for Windows*. (4.0). 1997. The Magdalen Centre, Oxford Science Park, Oxford OX4 4GA, UK, Cherwell Scientific Publishing Limited.

Ref Type: Computer Program

- (5) Heuer, L.; Ernst, L.; Schmutzler, R.; Schomburg, D. *Angew.Chem.Int.Ed.* **1989**, *28*, 1507-1509.
- (6) SAINT 6.02, 1997-1999, Bruker AXS, Inc., Madison, Wisconsin, USA.
- (7) SADABS George Sheldrick, 1999, Bruker AXS, Inc., Madison, Wisconsin, USA.
